# Supplementary material
Source: PubMed Central journal article supplement (PMC5393390)
Supplement: 10.1074_M116.066035_mcp.M116.066035-1.pdf [file 10.1074_M116.066035_mcp.M116.066035-1.pdf]

*Molecular and Cellular Proteomics Supplementary information for:*

**Asparagine-Linked Glycans of *Cryptosporidium parvum* Contain a Single Long Arm, Are Barely Processed in the ER or Golgi, and Show a Strong Bias for Sites with Threonine**

John R. Haserick<sup>‡§</sup>, Deborah Leon<sup>‡</sup>,  
John Samuelson<sup>§</sup>, and Catherine E. Costello<sup>‡\*\*</sup>

<sup>‡</sup>Center for Biomedical Mass Spectrometry, Department of Biochemistry, Cell Biology and Genomics, Boston University School of Medicine, Boston, Massachusetts 02118 and

<sup>§</sup>Department of Molecular and Cell Biology, Boston University Goldman School of Dental Medicine, Boston, Massachusetts 02118

Fig. S1. Topology of the second most abundant glycoform of deuterio-reduced and permethylated Hex<sub>5</sub>HexNAc<sub>2</sub> released from *C. parvum* glycoproteins, determined by EED FT-ICR MS/MS at 14 eV.

Fig. S2. Determination of linkage positions based on cross-ring cleavages observed in the 14-eV EED FT-ICR MS/MS spectrum of Hex<sub>5</sub>HexNAc<sub>2</sub> glycans released from *C. parvum* glycoproteins, after deuterio-reduction and permethylation, [M + Na]<sup>+</sup> *m/z* 1596.8199.

Fig. S3. The predicted lipid-linked *N*-glycan precursors of *C. parvum* and *T. gondii*.

Table S1. Glycotransferase enzymes predicted from the genomes of *C. parvum*, and a related organism, *T. gondii*.

Excel S1. (separate file). Fragment ion assignments for FT-ICR EED MS/MS spectra of deuterio-reduced and permethylated *N*-glycans released from *C. parvum* glycoproteins.

Excel S2 (separate file). NxT vs. NxS (x ≠ P) Occupancy on *C. parvum* glycopeptides

Excel S3 (separate file). Complete list of glycopeptides, proteins, and related bioinformatics data.

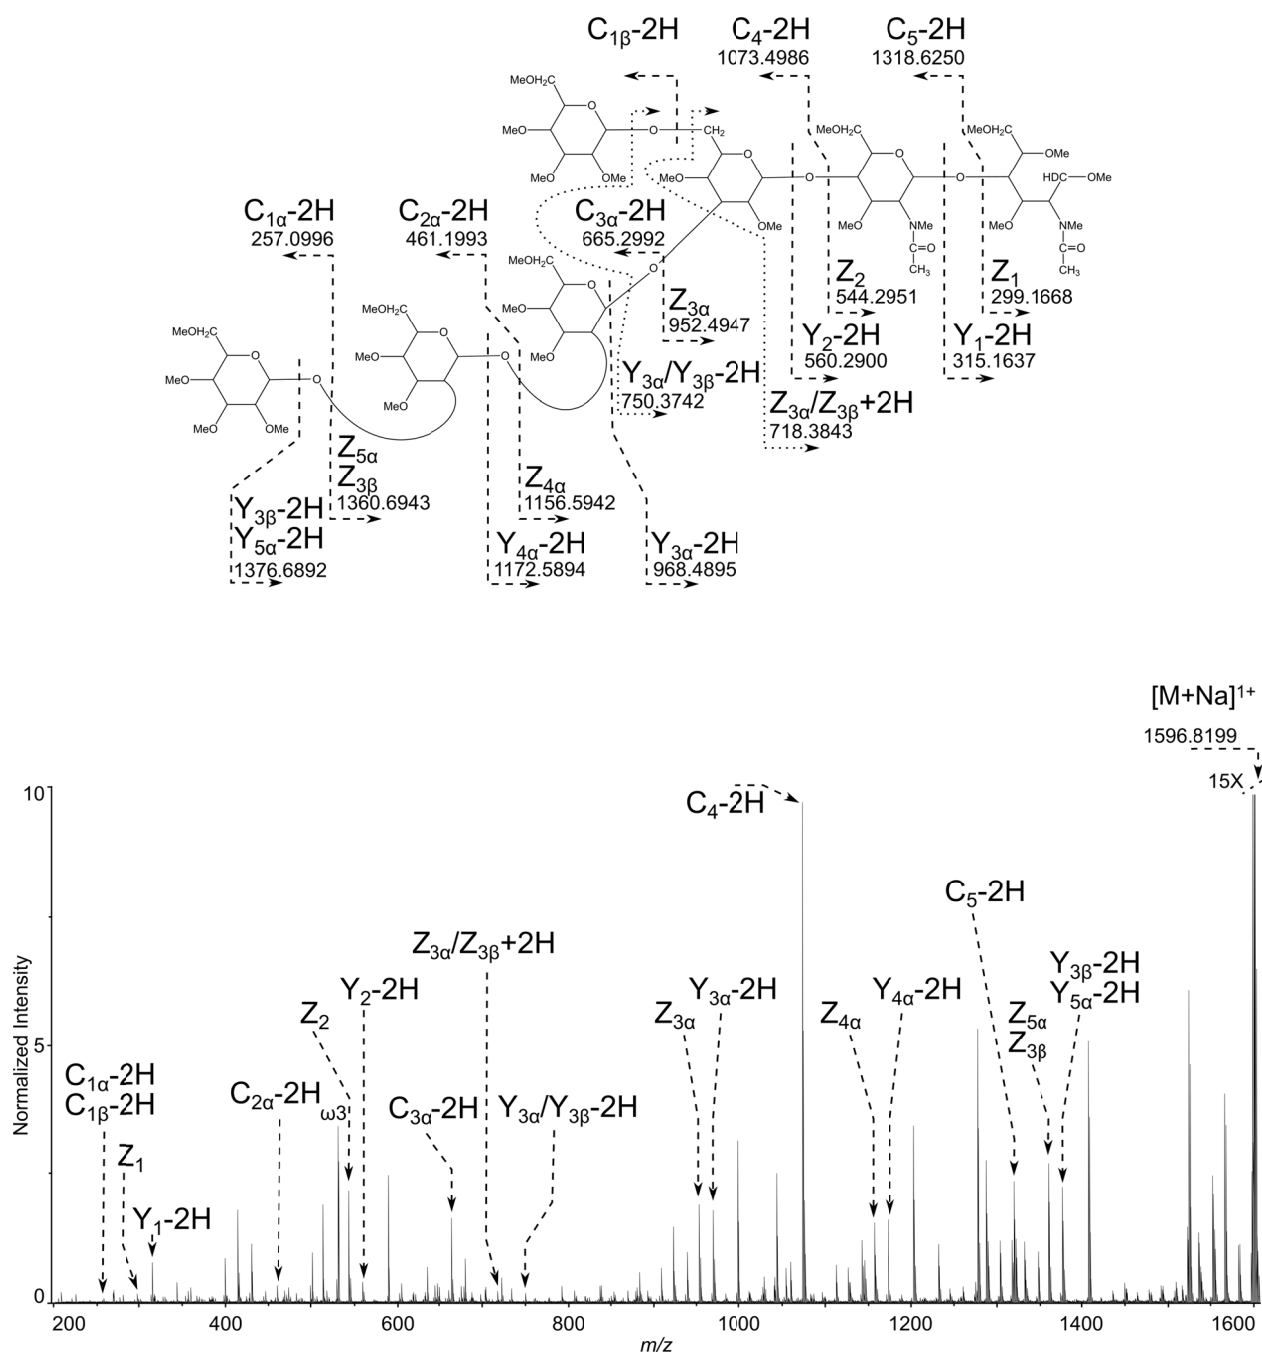

Fig. S1. Assignments of glycan sequence and topology for the second most abundant glycoform HexNAc<sub>2</sub>Hex<sub>5</sub> released from *C. parvum*, glycoproteins. Glycans were reduced with NaBD<sub>4</sub> and permethylated. The EED spectrum was determined at 14 eV for  $[M + Na]^+$   $m/z$  1596.8199. Glycosidic fragments provide information on residue masses and connectivity. The assignments for glycosidic bond fragments are shown in this figure. Cross-ring cleavages are assigned in Figure S2.

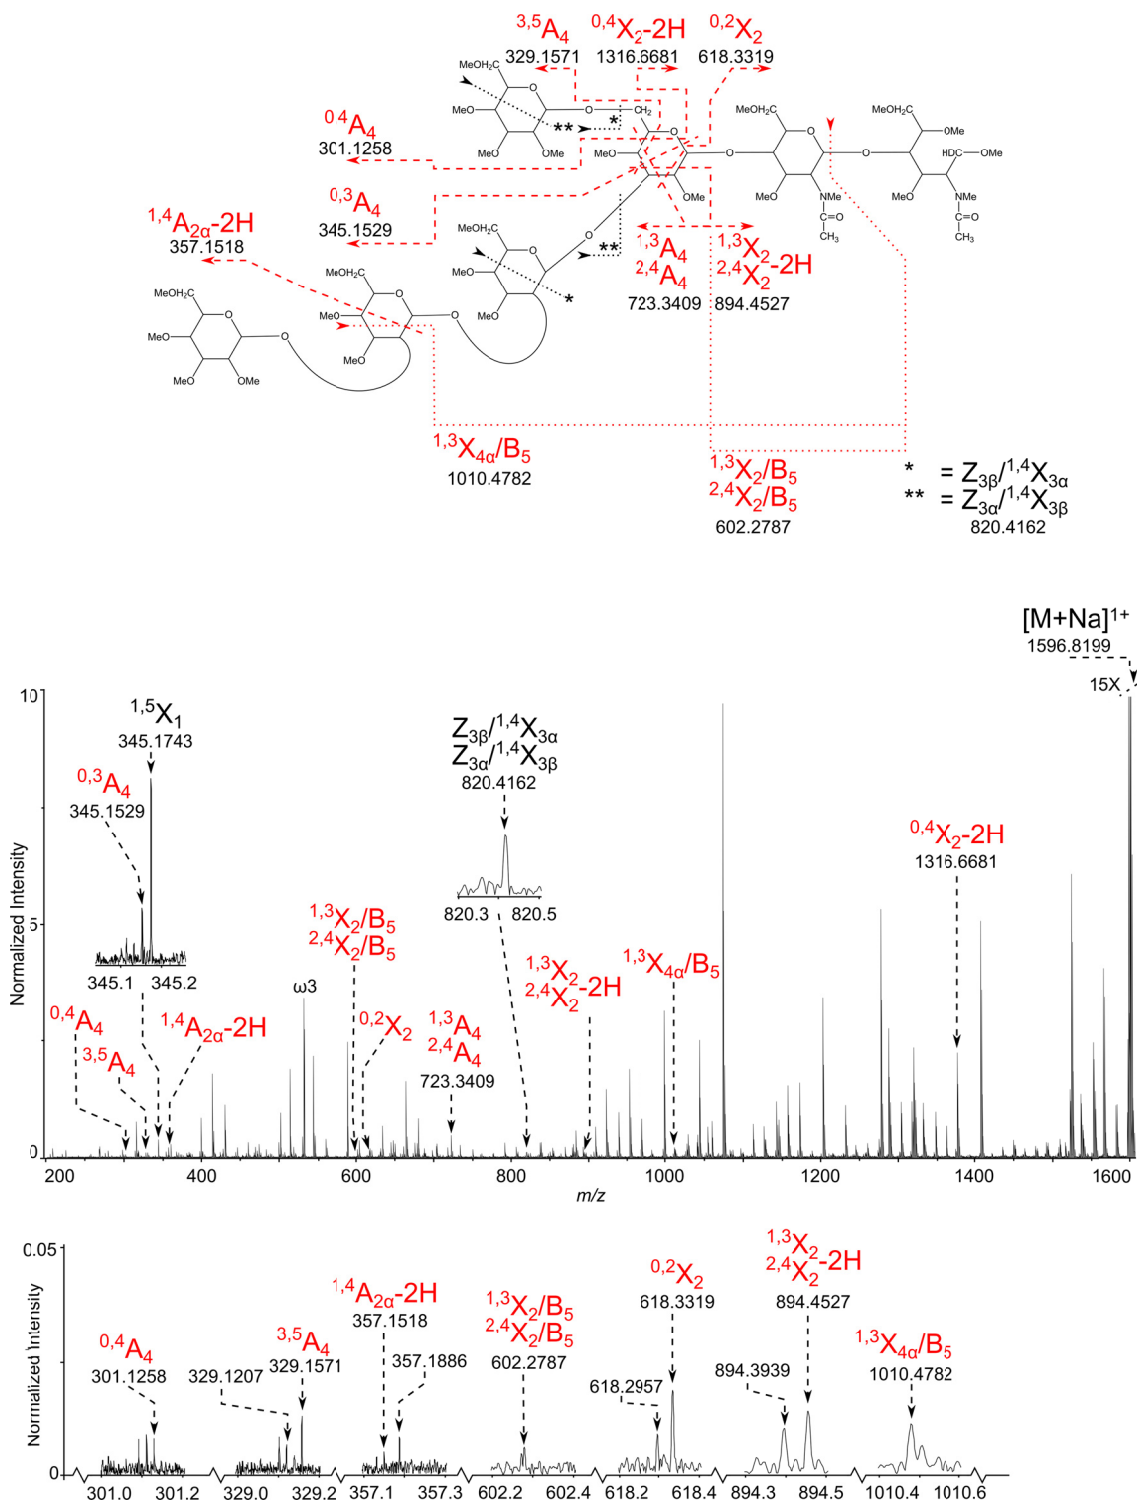

Figure S2. Assignments of cross-ring fragments in the 14-eV EED mass spectrum of deuterio-reduced and permethylated Hex<sub>5</sub>HexNAC<sub>2</sub> released from *C. parvum* glycoproteins, [M + Na]<sup>+</sup> m/z 1596.8199. Cross-ring cleavages provide information on linkage positions.

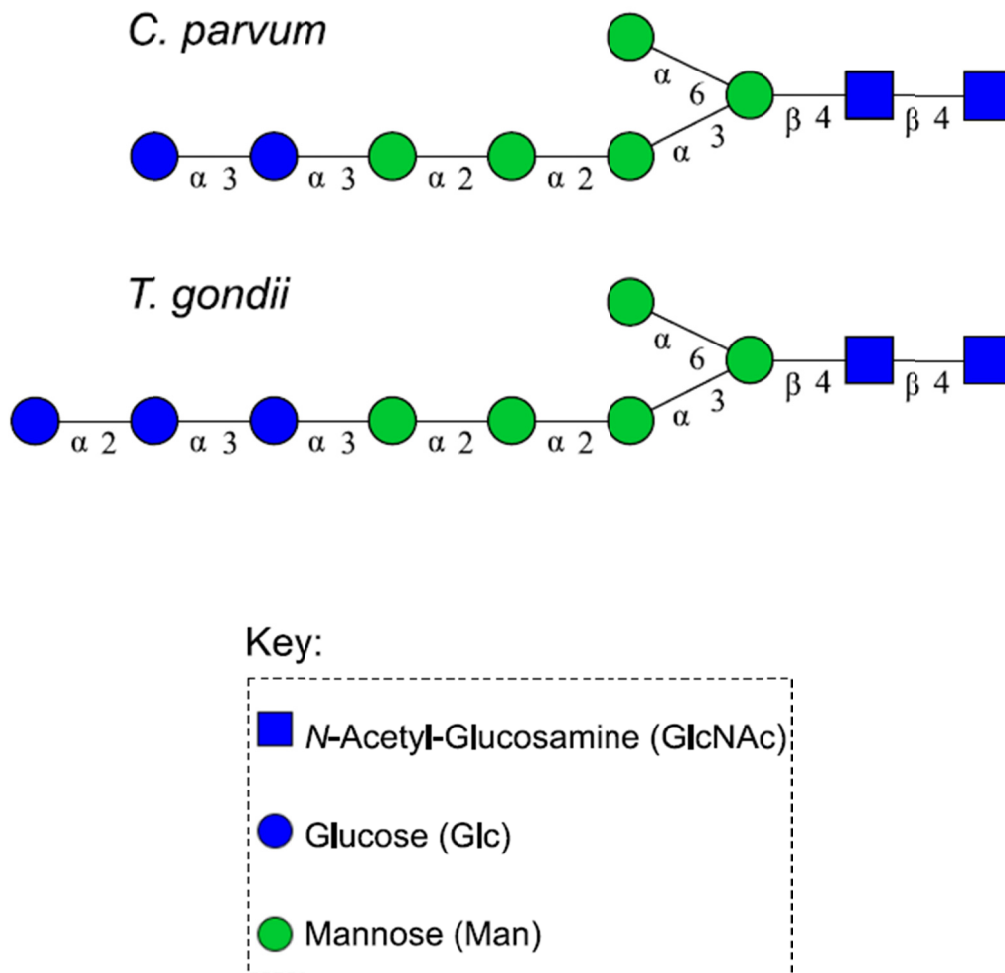

Figure S3. The predicted Lliid-linked N-glycan precursors of *C. parvum* and *T. gondii*.

**Table S1. Predicted Alg enzymes, glucosidases, and OST peptides of *C. parvum* and *T. gondii*.**

| <b>Protein</b> | <b><i>C. parvum</i></b> | <b><i>T. gondii</i></b> |
|----------------|-------------------------|-------------------------|
| Alg7           | cgd5_2240               | TGGT1_244520            |
| Alg13          | absent*                 | TGGT1_268340            |
| Alg14          | cgd7_4930               | TGGT1_207070            |
| Alg1           | cgd7_1810               | TGGT1_230590            |
| Alg2           | cgd1_230                | TGGT1_227790            |
| Alg11          | cgd4_2990               | TGGT1_246982            |
| DPM1           | cgd5_2040               | TGGT1_277970            |
| Alg5           | cgd5_2590               | TGGT1_216540            |
| Alg6           | cgd4_3120               | TGGT1_262030            |
| Alg8           | cgd1_2100               | TGGT1_314730            |
| Alg10          | absent                  | TGGT1_321660            |
| Gls 1          | absent                  | TGGT1_242020            |
| Gls2- $\alpha$ | cgd8_1420               | TGGT1_253030            |
| ER MNS1        | absent**                | absent                  |
| Golgi MNS2     | absent                  | absent                  |
| UGGT           | absent                  | absent                  |
| Calnexin       | absent                  | TGGT1_310320            |
| ERGIC53        | cgd6_5140               | TGGT1_258950            |
| STT3           | cgd6_2040               | TGGT1_231430            |
| WBP1           | cgd2_1650               | TGGT1_203970            |
| Ribophorin1    | cgd6_5070               | TGGT1_202572            |
| DAD1           | gd5_2300                | TGGT1_305870            |

\*Alg13 is absent in *C. parvum* and *C. hominis* but is present in *C. muris* (CMU-005550).

\*\* probes for MNS1, MNS2, and UGGT derive from *Saccharomyces cerevisiae* (Bannerjee 2007).
